# Supplementary material
Source: Royal Society of Chemistry journal article supplement (doi:10.1039/d6ce00045b)
Supplement: d6ce00045b1.pdf [file d6ce00045b1.pdf]

***Supporting information***

**Regulating Memristor Performance of Organic-Inorganic Hybrid  
Polyoxometalates via Counter Cations**

Hui-Xue Lei, Ze-Xun Zhang, Xin-Xiong Li, Qiao-Huang Wei,\* Hao-Hong  
Li,\* and Shou-Tian Zheng\*

# 1 Section S1 Experimental Procedures

**Table S1.** Crystal data and structure refinement parameters for compound **1** and **2**.

| compound                                      | <b>1</b>                                                                                           | <b>2</b>                                                                                           |
|-----------------------------------------------|----------------------------------------------------------------------------------------------------|----------------------------------------------------------------------------------------------------|
| Empirical formula                             | C <sub>90</sub> H <sub>80</sub> CuIMnMo <sub>6</sub> N <sub>2</sub> O <sub>24</sub> P <sub>3</sub> | C <sub>68</sub> H <sub>80</sub> CuIMnMo <sub>6</sub> N <sub>2</sub> O <sub>24</sub> P <sub>2</sub> |
| Formula weight                                | 2487.62                                                                                            | 2781.15                                                                                            |
| Crystal system                                | triclinic                                                                                          | triclinic                                                                                          |
| Space group                                   | <i>P</i> -1                                                                                        | <i>P</i> -1                                                                                        |
| <i>a</i> (Å)                                  | 12.183(2)                                                                                          | 16.838(2)                                                                                          |
| <i>b</i> (Å)                                  | 19.984(4)                                                                                          | 17.871(2)                                                                                          |
| <i>c</i> (Å)                                  | 20.262(4)                                                                                          | 20.708(3)                                                                                          |
| $\alpha$ (°)                                  | 83.979(3)                                                                                          | 91.900(2)                                                                                          |
| $\beta$ (°)                                   | 74.039(3)                                                                                          | 100.406(2)                                                                                         |
| $\gamma$ (°)                                  | 75.983(3)                                                                                          | 107.973(2)                                                                                         |
| <i>V</i> (Å <sup>3</sup> )                    | 4597.7(14)                                                                                         | 5803.4(12)                                                                                         |
| <i>Z</i>                                      | 2                                                                                                  | 2                                                                                                  |
| $\rho_{\text{calc}}$ (g cm <sup>-3</sup> )    | 1.797                                                                                              | 1.591                                                                                              |
| $\mu$ (mm <sup>-1</sup> )                     | 1.612                                                                                              | 1.277                                                                                              |
| <i>F</i> (000)                                | 2460.0                                                                                             | 2794.0                                                                                             |
| Temperature/K                                 | 170.0                                                                                              | 170.0                                                                                              |
| Reflections collected                         | 47144                                                                                              | 50078                                                                                              |
| Size (mm)                                     | 0.1 × 0.1 × 0.08                                                                                   | 0.12 × 0.1 × 0.05                                                                                  |
| Independent reflections                       | 15645 [R <sub>int</sub> = 0.0964, R <sub>sigma</sub> = 0.1167]                                     | 19877 [R <sub>int</sub> = 0.0269, R <sub>sigma</sub> = 0.0371]                                     |
| Data/restraints/parameters                    | 15645/0/1156                                                                                       | 19877/161/946                                                                                      |
| Goodness-of-fit on F <sup>2</sup>             | 1.038                                                                                              | 1.030                                                                                              |
| Final R indexes [ <i>I</i> ≥ 2σ ( <i>I</i> )] | R <sub>1</sub> = 0.0796, wR <sub>2</sub> = 0.2219                                                  | R <sub>1</sub> = 0.0523, wR <sub>2</sub> = 0.1597                                                  |
| Final R indexes [all data]                    | R <sub>1</sub> = 0.1499, wR <sub>2</sub> = 0.2838                                                  | R <sub>1</sub> = 0.0625, wR <sub>2</sub> = 0.1745                                                  |

$$R_1 = \frac{\sum ||F_o| - |F_c||}{\sum |F_o|}, wR_2 = \frac{[\sum w(F_o^2 - F_c^2)^2 / \sum w(F_o^2)^2]^{1/2}}{w}, w = 1/[\sigma^2(F_o^2) + (xP)^2 + yP], P = (F_o^2 + 2F_c^2)/3$$

**Table S2.** The bond valence sum calculations of the Mo, Mn and Cu atoms in compounds **1** and **2**.

| Compound 1 |            |               | Compound 2 |            |               |
|------------|------------|---------------|------------|------------|---------------|
| Atoms code | Bond Value | Valence state | Atoms code | Bond Value | Valence state |
| Mo1        | 6.082      | +6            | Mo1        | 5.997      | +6            |
| Mo2        | 6.157      | +6            | Mo2        | 5.948      | +6            |
| Mo3        | 6.030      | +6            | Mo3        | 5.983      | +6            |
| Mo4        | 6.065      | +6            | Mo4        | 6.070      | +6            |
| Mo5        | 6.198      | +6            | Mo5        | 6.046      | +6            |
| Mo6        | 6.006      | +6            | Mo6        | 5.948      | +6            |
| Mn1        | 3.399      | +3            | Mn1        | 3.386      | +3            |
| Mn2        | 3.419      | +3            | Mn2        | 3.446      | +3            |
| Cu1        | 0.908      | +1            | Cu1        | 0.903      | +1            |

**Table S3.** RS parameters of memory devices in this work.

| device                                                   | RS performance type | $V_{set}/V_{reset}$ | $I_{on/off}$       |
|----------------------------------------------------------|---------------------|---------------------|--------------------|
| ITO/CuI/Ag                                               | silent              | -                   | -                  |
| ITO/MnMo <sub>6</sub> O <sub>18</sub> L <sub>2</sub> /Ag | flash               | 1.38 V/-4.19 V      | 4.11               |
| ITO/Ph <sub>4</sub> PBr/Ag                               | flash               | 2.33 V/-7.90 V      | 88.99              |
| ITO/C <sub>24</sub> H <sub>28</sub> PBr/Ag               | flash               | 1.35 V/-4.12 V      | 1.45               |
| ITO/1/Ag                                                 | worm                | 1.12 V/-            | $2.88 \times 10^4$ |
| ITO/2/Ag                                                 | worm                | 0.99 V/-            | $1.01 \times 10^3$ |
| ITO/1/Ag at 200 °C                                       | worm                | 0.67 V/-            | $1.78 \times 10^3$ |
| ITO/2/Ag at 200 °C                                       | worm                | 0.80 V/-            | $4.65 \times 10^2$ |

**Table S4.** The comparison with relative POM-based memristors.

| device                                                                                                                                                                                                                                                           | RS performance type | $V_{set}/V_{reset}$ | $I_{on/off}$           | tolerant temperature | Ref. |
|------------------------------------------------------------------------------------------------------------------------------------------------------------------------------------------------------------------------------------------------------------------|---------------------|---------------------|------------------------|----------------------|------|
| ITO/Na <sub>10</sub> (H <sub>2</sub> O) <sub>36</sub> [Co <sub>2</sub> (phen) <sub>2</sub> (4,4' bipy)(Nb <sub>6</sub> O <sub>19</sub> ) <sub>2</sub> ]·19H <sub>2</sub> O/Ag                                                                                    | flash               | 1.12 V/-7 V         | 1.18 × 10 <sup>3</sup> | 70 °C                | 1    |
| ITO/ Na <sub>6</sub> V <sub>10</sub> O <sub>28</sub> /Cr/Au                                                                                                                                                                                                      | flash               | 1.2 V/0.8 V         | 25                     | /                    | 2    |
| ITO/ {[Co <sub>2</sub> (bpdo) <sub>4</sub> (H <sub>2</sub> O) <sub>6</sub> (α-GeW <sub>12</sub> O <sub>40</sub> )}·4(H <sub>2</sub> O)} <sub>n</sub> /Ag                                                                                                         | flash               | 1.77 V/-3.42 V      | 1.0 × 10 <sup>2</sup>  | 150 °C               | 3    |
| ITO/H <sub>4</sub> [Na(H <sub>2</sub> O) <sub>5</sub> ] <sub>2</sub> [Co <sup>II</sup> (en) <sub>3</sub> ] <sub>2</sub> {[Co <sup>III</sup> (en)] <sub>2</sub> (Ta <sub>6</sub> O <sub>19</sub> ) <sub>2</sub> }22H <sub>2</sub> O /Ag                           | flash               | 3.79 V/-7.64 V      | 1.43 × 10 <sup>3</sup> | /                    | 4    |
| ITO/[Co(H <sub>2</sub> O) <sub>6</sub> ] <sub>2</sub> [Co <sub>3</sub> (bpdo) <sub>4</sub> (H <sub>2</sub> O) <sub>10</sub> ][Co <sub>4</sub> (H <sub>2</sub> O) <sub>2</sub> (B-a PW <sub>9</sub> O <sub>34</sub> ) <sub>2</sub> ]·2 bpdo·14H <sub>2</sub> O /A | flash               | -0.63 V/0.75 V      | 55.5                   | 270 °C               | 5    |
| ITO/(MV) <sub>2</sub> [Cu <sub>2</sub> I <sub>3</sub> ](Mn Mo <sub>6</sub> O <sub>18</sub> L <sub>2</sub> )·4CH <sub>3</sub> CN /Ag                                                                                                                              | flash               | 0.97 V/-3.49 V      | 2.32 × 10 <sup>2</sup> | 240 °C               | 6    |
| ITO/H <sub>3</sub> PW <sub>12</sub> O <sub>40</sub> @PMMA/Au                                                                                                                                                                                                     | flash               | 1.2 V/-1.71 V       | 6×10 <sup>2</sup>      | /                    | 7    |
| FTO/[Ni(en) <sub>3</sub> ] <sub>2</sub> [β - V <sub>8</sub> <sup>IV</sup> V <sub>2</sub> <sup>V</sup> B <sub>28</sub> O <sub>56</sub> (OH) <sub>18</sub> ]/Ag                                                                                                    | worm                | 0.82 V              | 6.67× 10 <sup>3</sup>  | /                    | 8    |
| FTO/(H <sub>2</sub> 1,3dap) <sub>6</sub> [V <sub>8</sub> <sup>IV</sup> V <sub>2</sub> <sup>V</sup> B <sub>26</sub> O <sub>64</sub> (OH) <sub>4</sub> (1,3dap) <sub>2</sub> ·(1,3dap)]2·H <sub>2</sub> O /Ag                                                      | worm                | 0.79 V              | 1.07 × 10 <sup>4</sup> | /                    |      |

|          |      |        |                    |        |           |
|----------|------|--------|--------------------|--------|-----------|
| ITO/1/Ag | worm | 0.99 V | $2.88 \times 10^4$ | 200 °C | This work |
| ITO/2/Ag | worm | 1.12 V | $1.01 \times 10^3$ | 200 °C | This work |

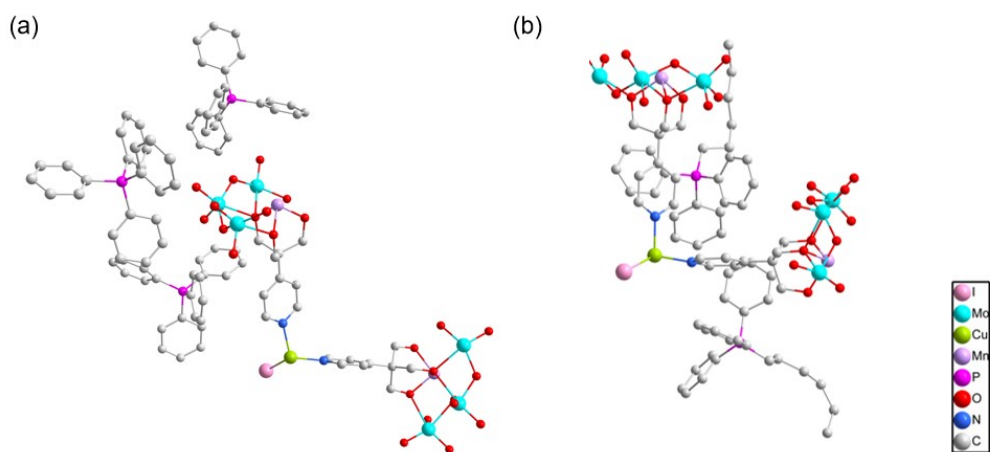

Fig. S1. Asymmetric units of compound 1 (a) and compound 2 (b).

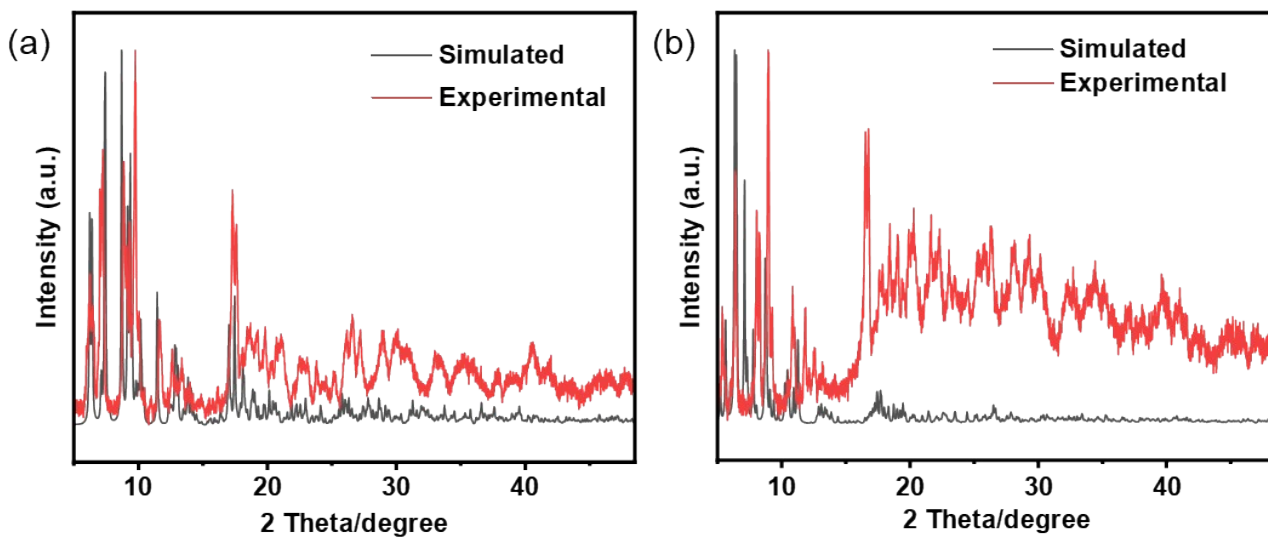

Fig. S2. The simulated and experimental PXRD patterns of compound 1(a) and compound 2 (b).

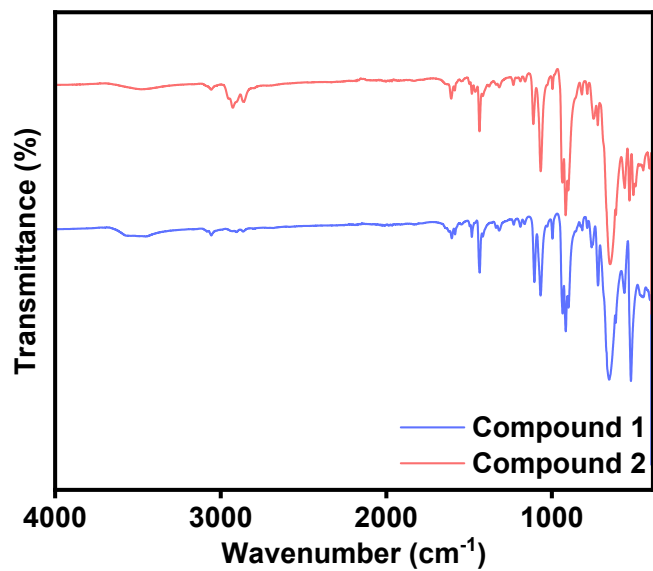

Fig. S3. IR spectra of compound 1 and compound 2.

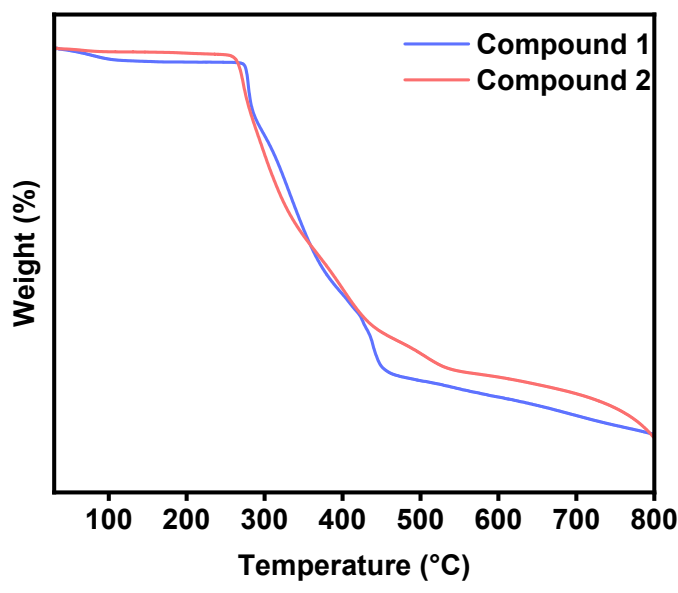

Fig. S4. TG curves of compound 1 and compound 2.

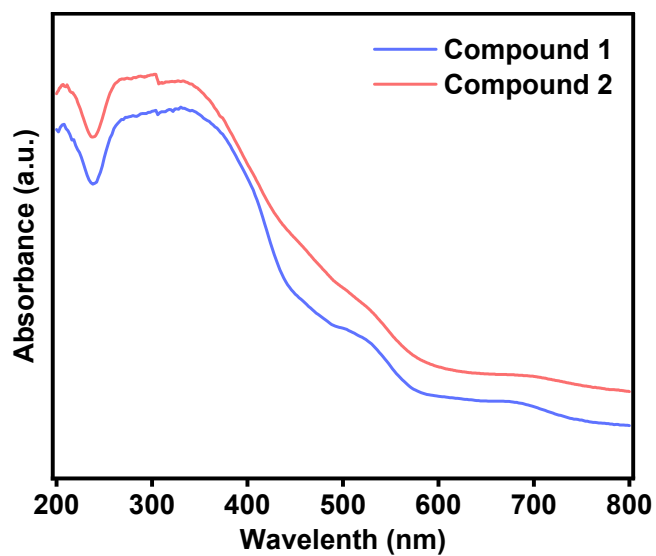

Fig. S5. UV-Vis absorption spectra of compound 1 and compound 2.

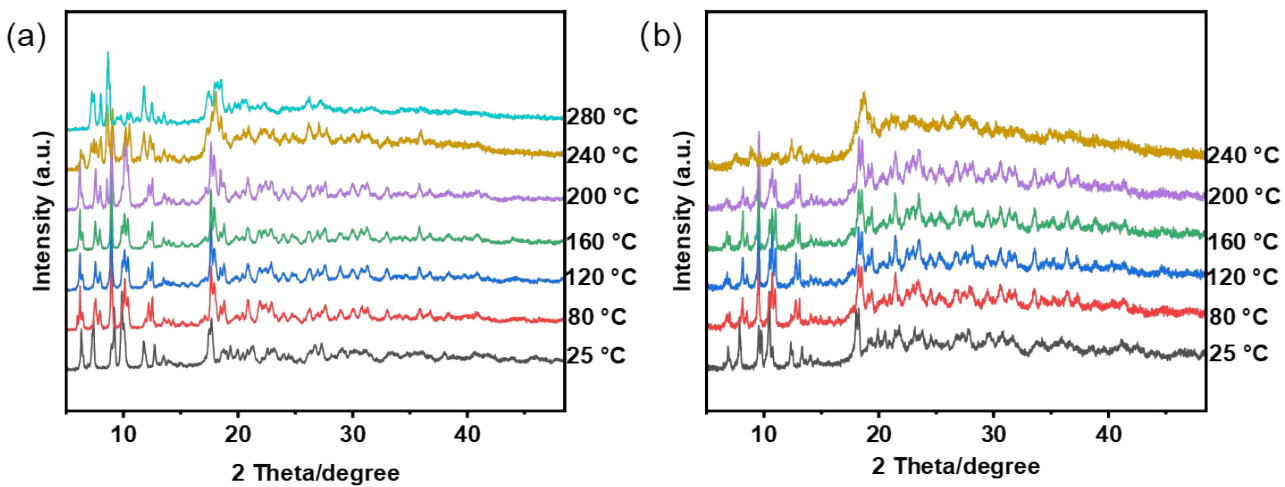

Fig. S6. Temperature-dependent PXRD patterns of compound 1 (a) and compound 2 (b).

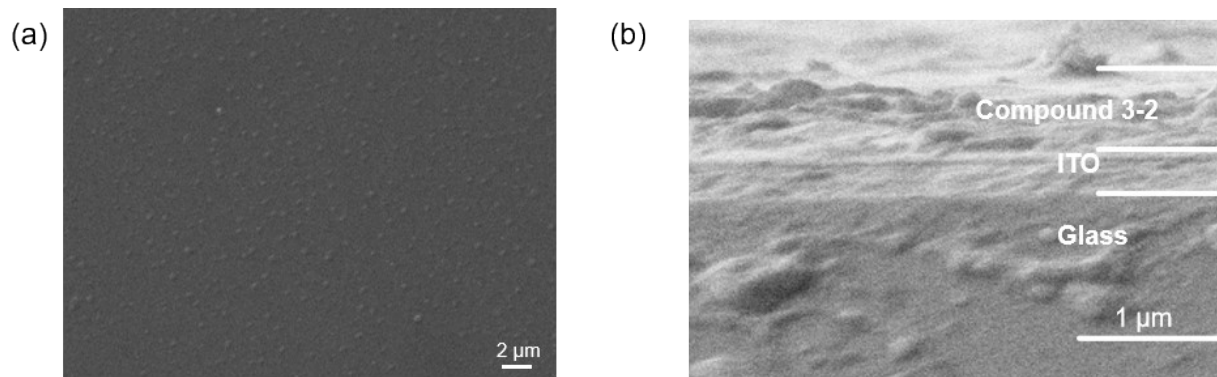

**Fig. S7.** (a) The surface SEM image of ITO/2/Ag memory device and (b) the cross-sectional SEM images of the ITO/2/Ag memory device.

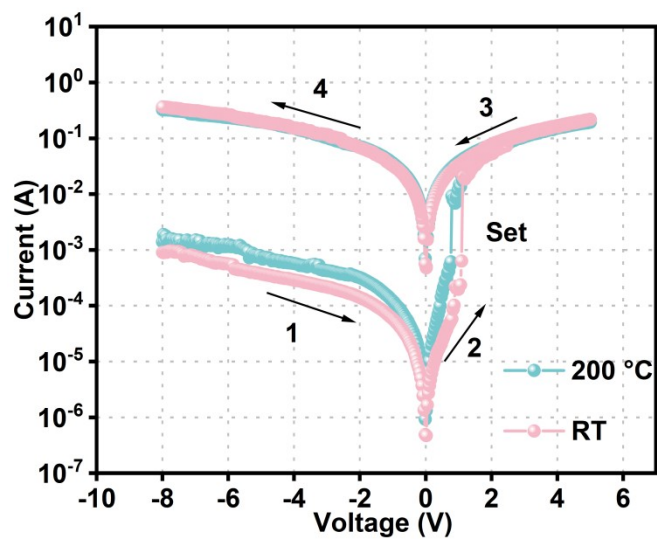

**Fig. S8.** *I-V* curves of ITO/2/Ag at different temperatures.

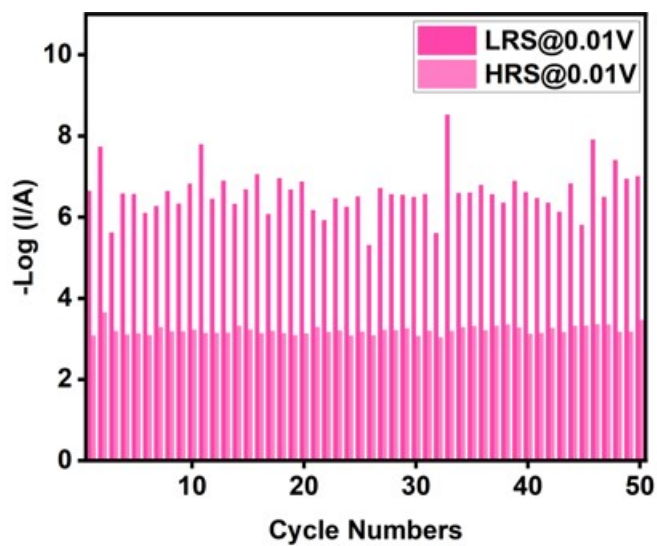

Fig. S9. Cyclic tolerance diagram for ITO/2/Ag at RT.

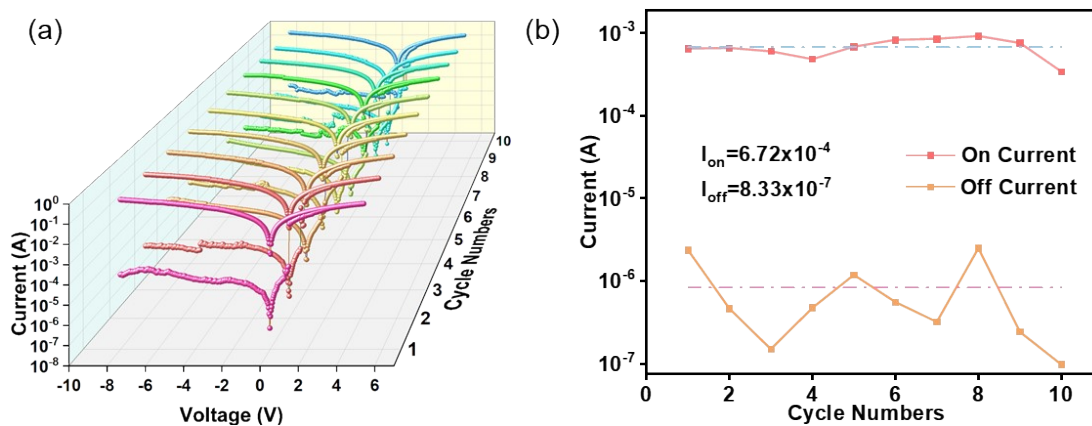

Fig. S10. For ITO/2/Ag at RT. (a) Ten cycles  $I$ - $V$  curves. (b) The current changes of HRS and LRS following ten cycles.

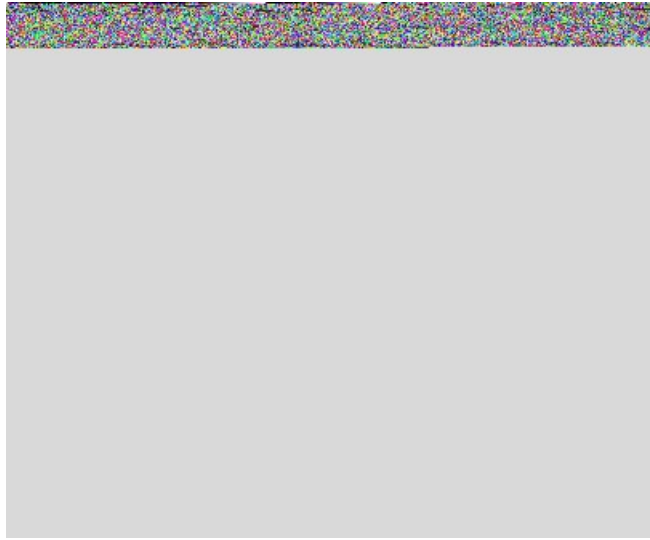

**Fig. S11.** Cyclic tolerance diagram for ITO/2/Ag at 200 °C.

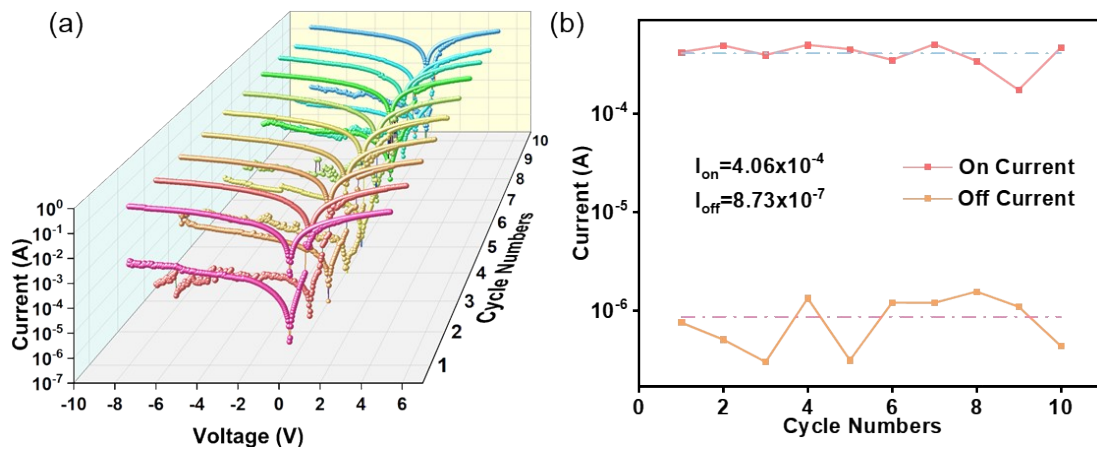

**Fig. S12.** For ITO/2/Ag at 200 °C. (a) Ten cycles  $I$ - $V$  curves. (b) The current changes of HRS and LRS following ten cycles.

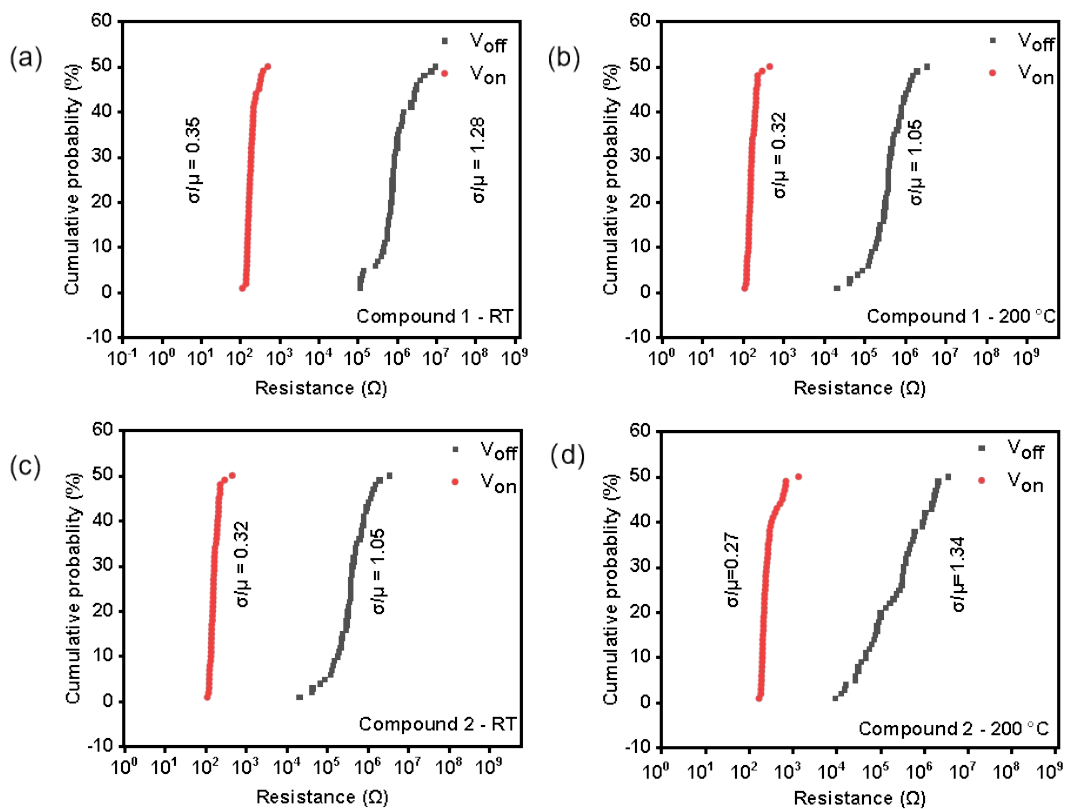

**Fig. S13.** CP of OFF and ON current distributions (a) ITO/1/Ag at RT; (b) ITO/1/Ag at 200 °C; (c) ITO/2/Ag at RT; (d) ITO/2/Ag at 200 °C.

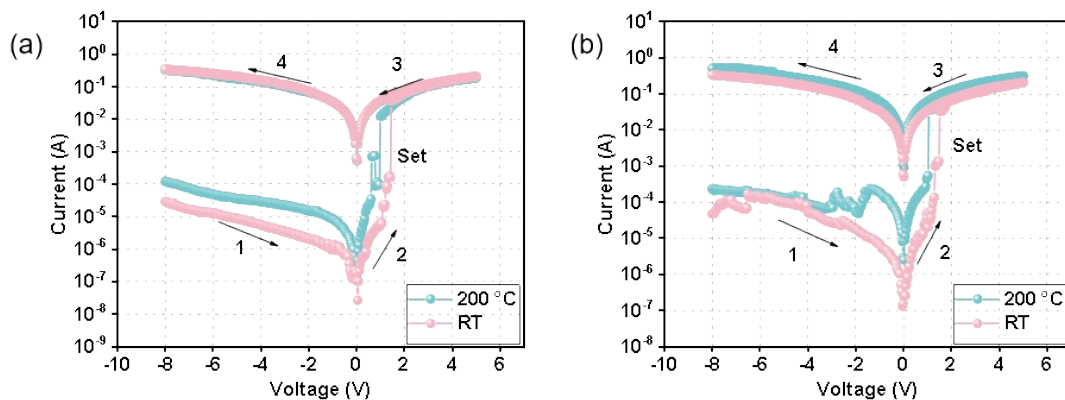

**Fig. S14.** After 1 year (a)  $I$ - $V$  curves of ITO/1/Ag at different temperature; (b)  $I$ - $V$  curves of ITO/2/Ag at different temperature.

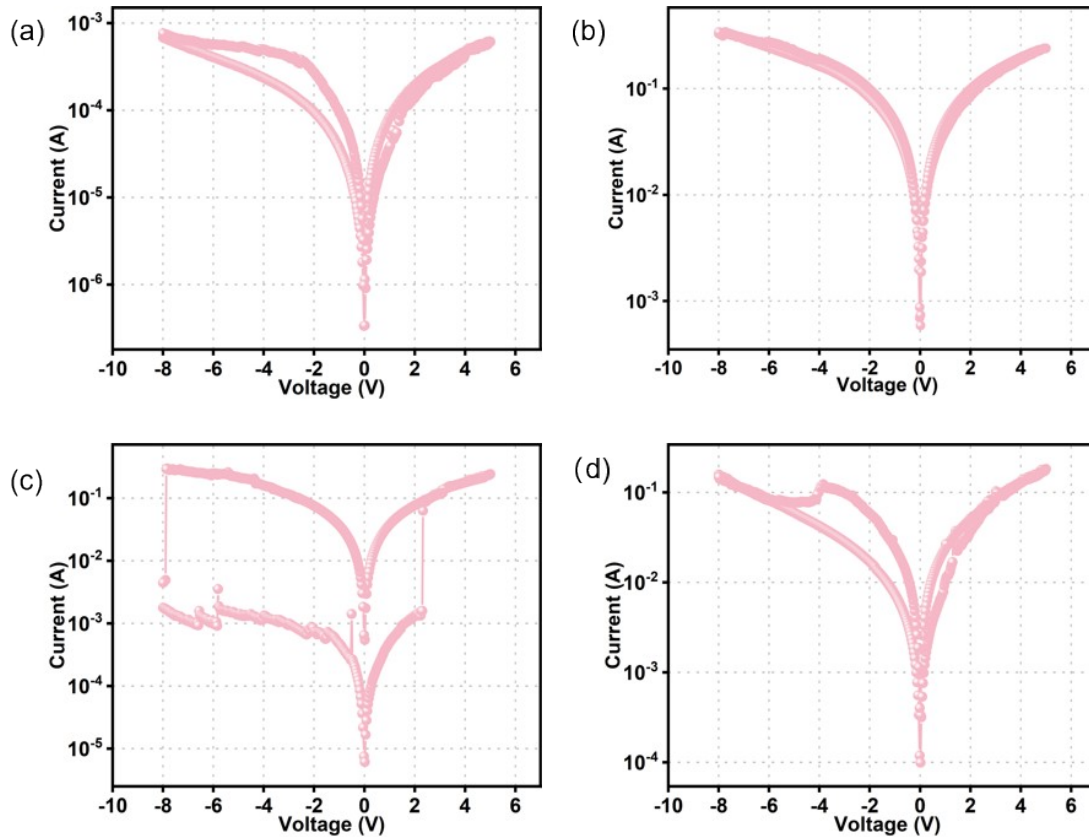

Fig. S15.  $I$ - $V$  curves (a) ITO/(TBA)<sub>3</sub>[MnMo<sub>6</sub>O<sub>18</sub>L<sub>2</sub>]·2CH<sub>3</sub>CN/Ag; (b) ITO/CuI/Ag; (c) ITO/Ph<sub>4</sub>PBr/Ag; (d) ITO/n-HTPPBr/Ag.

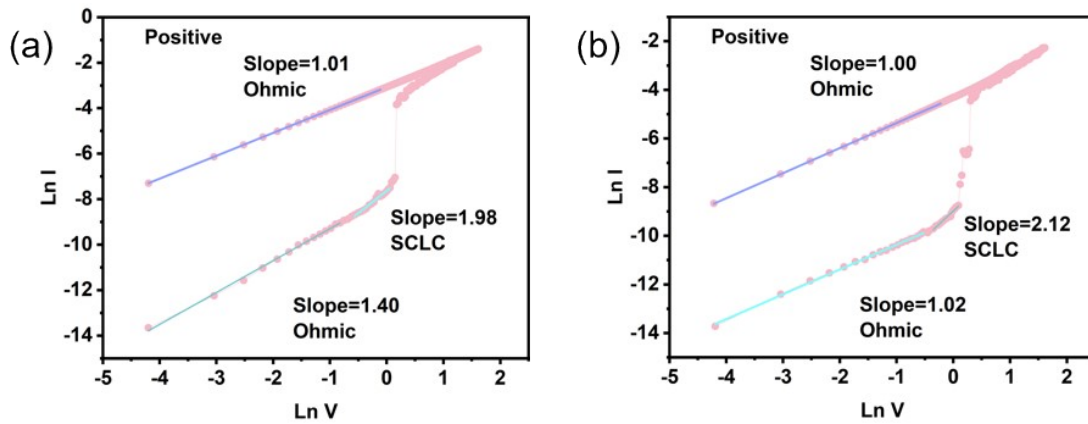

Fig. S16. Ln-ln plots on the  $I$ - $V$  curves of the ITO/2/Ag device (a) in the Set process at RT; (b) in the Set process at 200 °C.

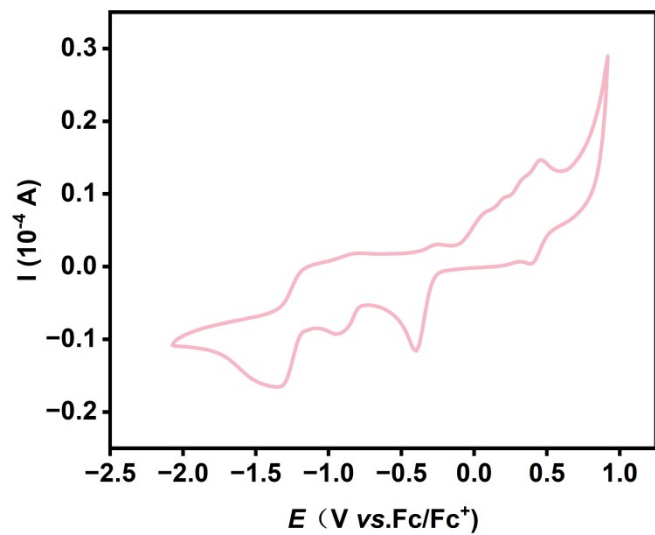

Fig. S17. CV curves of 2.

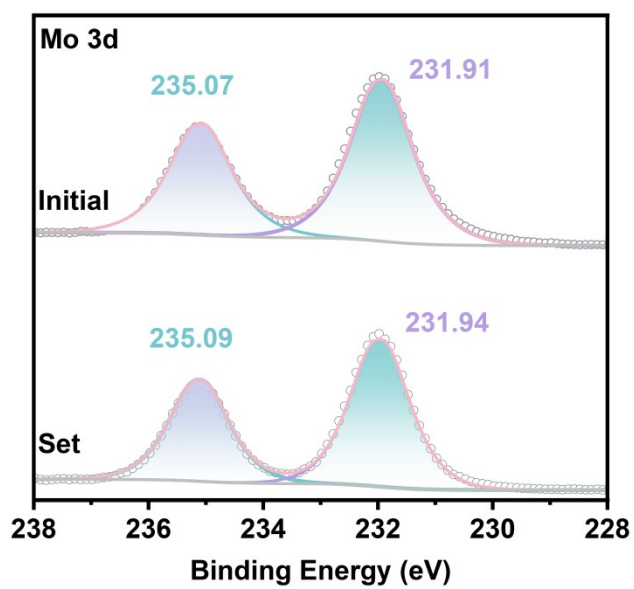

Fig. S18. XPS spectra of 1 Mo 3d.

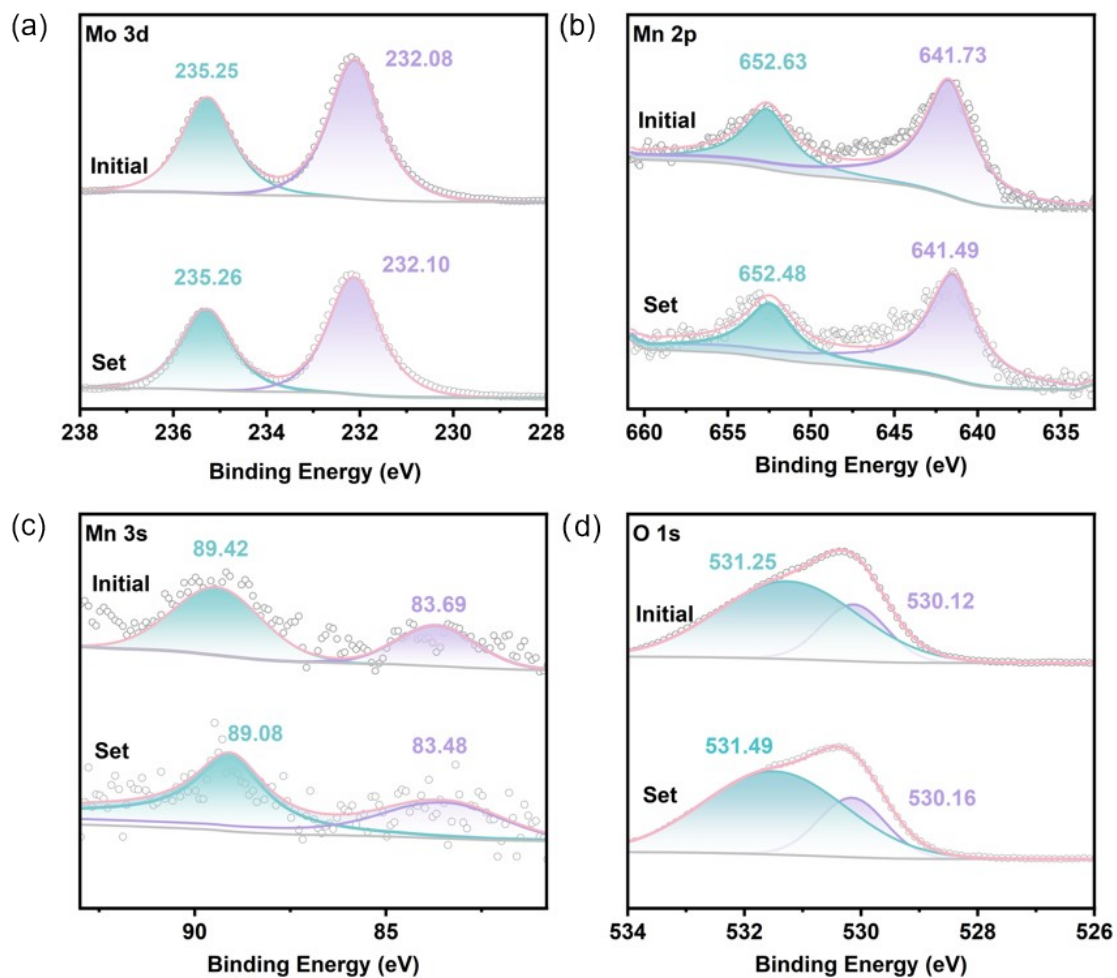

Fig. S19. XPS spectra of 2: (a) Mo 3d; (b) Mn 2p; (c) Mn 3s; (d) O 1s.

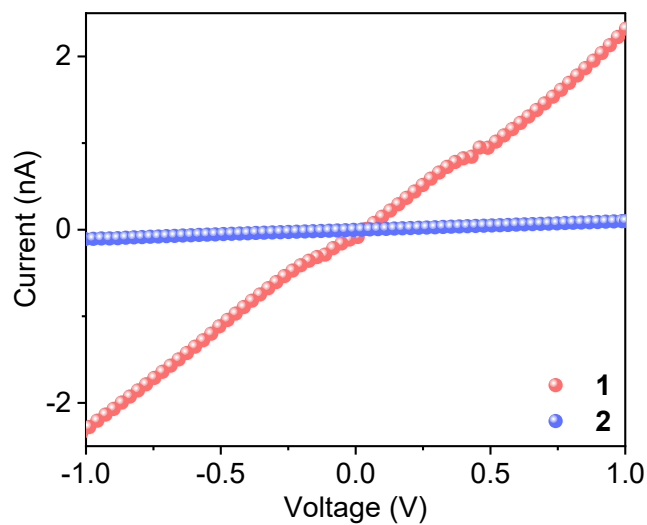

Fig. S20.  $I-V$  curves of pellet sample 1 and 2.

## References:

1. Y.-J. Wang, N. Shi, C. Sun, Y.-Q. Sun and S.-T. Zheng, *Inorg. Chem.*, 2023, **62**, 10675-10683.
2. S. N. S, N. Basu, M. Cahay, S. M. N, S. S. Mal and P. P. Das, *Phys. Status Solidi A.*, 2020, **217**, 2000306.
3. B. Chen, Y.-R. Huang, K.-Y. Song, X.-L. Lin, H.-H. Li and Z.-R. Chen, *Chem. Mater*, 2021, **33**, 2178-2186.
4. Y.-F. Cao, Y.-J. Lin, X.-X. Li, Y.-Q. Sun and S.-T. Zheng, *CrystEngComm*, 2024, **26**, 3527-3534.
5. Y. R. Huang, X. L. Lin, B. Chen, H. D. Zheng, Z. R. Chen, H. H. Li and S. T. Zheng, *Angew. Chem. Int. Ed.*, 2021, **60**, 16911-16916.
6. H.-B. Chen, M.-Y. He, T. Li, C.-C. Deng, H.-P. Xiao, M.-Q. Qi, X.-J. Kong, H.-H. Li, X.-X. Li and S.-T. Zheng, *J. Mater. Chem. C*, 2024, **12**, 13555-13561.
7. X. Chen, P. Huang, X. Zhu, S. Zhuang, H. Zhu, J. Fu, A. S. Nissimagoudar, W. Li, X. Zhang, L. Zhou, Y. Wang, Z. Lv, Y. Zhou and S.-T. Han, *Nanoscale Horiz*, 2019, **4**, 697-704.
8. M.-Z. Meng, Y.-Q. Gao, Y.-P. Chen, H.-H. Li and X.-H. Huang, *Inorg. Chem. Front*, 2025, **12**, 3186-3195.
